# Supplementary material for: Structural diversity of anthraquinone substituted p-tert-butylthiacalix[4]arene in the partial cone conformation upon external stimuli
Source: Royal Society of Chemistry journal article supplement (doi:10.1039/d4ce00387j), 2024-01-01
Supplement: d4ce00387j1.pdf [file d4ce00387j1.pdf]

**Structural diversity of anthraquinone substituted *p*-*tert*-butylthiacalix[4]arene  
in the *partial cone* conformation upon external stimuli**

Renny Maria Losus, Ruzal Sitdikov, Ivan Stoikov and Liliana Dobrzańska\*

**Supplementary Data**

**Table S1** Dihedral angles between the plane passing through four S atoms and the phenyl rings forming the macrocycle.

| Crystal Structure | C5 (°) | C31 (°) | C57 (°) | C83 (°) |
|-------------------|--------|---------|---------|---------|
| PC1a              | 33     | 89      | 85      | 90      |
| PC1b              | 31     | 86      | 84      | 88      |
| PC1c              | 60     | 83      | 87      | 83      |
| PC1d              | 62     | 88      | 85      | 89      |

**Table S2** Intramolecular interactions present in PC1a and PC1b.

| D-H...A         | PC1a    |          |             | PC1b           |         |          |             |
|-----------------|---------|----------|-------------|----------------|---------|----------|-------------|
|                 | H-A (Å) | D-A (Å)  | D-H...A (°) | D-H...A        | H-A (Å) | D-A (Å)  | D-H...A (°) |
| N1-H1...O3      | 2.00    | 2.649(3) | 130         | N1-H1...O3     | 2.02    | 2.650(3) | 132         |
| N2-H2...O7      | 1.98    | 2.635(2) | 137         | N2-H2...O7     | 1.94    | 2.631(2) | 140         |
| N3-H3...O11     | 1.91    | 2.610(3) | 141         | N3-H3...O11    | 1.92    | 2.611(2) | 140         |
| N4-H4...O15     | 1.87    | 2.618(2) | 139         | N4-H4...O15    | 1.94    | 2.620(2) | 139         |
| C40-H40...O6    | 2.22    | 2.820(3) | 120         | C40-H40...O6   | 2.24    | 2.835(3) | 120         |
| C92-H92...O14   | 2.20    | 2.821(3) | 122         | C92-H92...O14  | 2.20    | 2.832(3) | 123         |
| C66-H66...O10   | 2.25    | 2.859(3) | 122         | C66-H66...O10  | 2.24    | 2.856(3) | 122         |
| C11-H11A...O7   | 2.49    | 3.053(3) | 116         | C11-H11A...O7  | 2.41    | 3.030(3) | 120         |
| C79-H79C...O10  | 2.39    | 3.256(9) | 148         | C79-H79B...O10 | 2.43    | 3.271(3) | 144         |
| N1-H1...O14     | 2.80    | 3.260(3) | 114         | N1-H1...O14    | 2.80    | 3.277(3) | 119         |
| C11-H11A...O5   | 2.70    | 3.279(3) | 118         | C11-H11A...O5  | 2.66    | 3.264(2) | 120         |
| C58-H58...O14   | 2.61    | 3.292(3) | 129         | C58-H58...O14  | 2.58    | 3.262(3) | 129         |
| C11-H11A...S1   | 2.69    | 3.342(2) | 124         | C11-H11A...S1  | 2.68    | 3.330(2) | 124         |
| C55-H55A...O14  | 2.52    | 3.355(3) | 144         | C55-H55B...O3  | 2.77    | 3.566(3) | 139         |
| C53-H53C...O3   | 2.55    | 3.362(3) | 140         | C53-H53B...O3  | 2.58    | 3.438(3) | 147         |
| C89-H89B...S4   | 2.81    | 3.395(2) | 118         | C89-H89B...S4  | 2.79    | 3.382(2) | 119         |
| C37-H37B...S2   | 2.90    | 3.398(2) | 112         | C37-H37B...S2  | 2.89    | 3.405(2) | 113         |
| C29-H29C...O10  | 2.94    | 3.431(6) | 112         | C29-H29B...O10 | 2.86    | 3.409(4) | 116         |
| C84-H84...O10   | 2.75    | 3.447(3) | 131         | C84-H84...O10  | 2.80    | 3.497(3) | 131         |
| C63-H63A...S3   | 3.00    | 3.505(2) | 113         | C63-H63A...S3  | 3.02    | 3.516(2) | 112         |
| C55-H55A...O3   | 2.73    | 3.522(3) | 138         | C55-H55B...O14 | 2.57    | 3.399(3) | 143         |
| C63-H63B...S2   | 3.01    | 3.522(3) | 113         | C63-H63B...S2  | 3.01    | 3.519(2) | 113         |
| C52-H52...O2    | 2.90    | 3.772(3) | 153         | C52-H52...O2   | 2.81    | 3.643(3) | 146         |
| C79A-H79E...O10 | 2.42    | 3.39(2)  | 173         | C14-H14...O2   | 2.35    | 2.829(3) | 110         |

**Table S3** Selected  $\pi\cdots\pi$  interactions present in **PC1a** and **PC1b**.

| <b>PC1a</b>                     |                | <b>PC1b</b>                     |                |
|---------------------------------|----------------|---------------------------------|----------------|
| <b>D-H<math>\cdots</math>A</b>  | <b>H-A (Å)</b> | <b>D-H<math>\cdots</math>A</b>  | <b>H-A (Å)</b> |
| Cg11 $\cdots$ Cg14 <sup>i</sup> | 3.4301(13)     | Cg11 $\cdots$ Cg14 <sup>i</sup> | 3.4579(1)      |
| Cg3 $\cdots$ Cg8                | 3.4577(14)     | Cg3 $\cdots$ Cg8                | 3.4364(1)      |
| Cg3 $\cdots$ Cg14               | 3.5418(13)     | Cg3 $\cdots$ Cg14               | 3.6410(1)      |
| Cg12 $\cdots$ Cg15 <sup>i</sup> | 3.5496(14)     | Cg12 $\cdots$ Cg15 <sup>i</sup> | 3.5749(1)      |

Cg is the centroid of the aromatic rings: Cg11 (C69-C74), Cg3 (C17-C22), Cg14 (C91-C96), Cg12 (C72-C78), Cg8 (C46-C52), Cg15 (C95-C100); symmetry code: (i) 1-x,1-y,1-z.

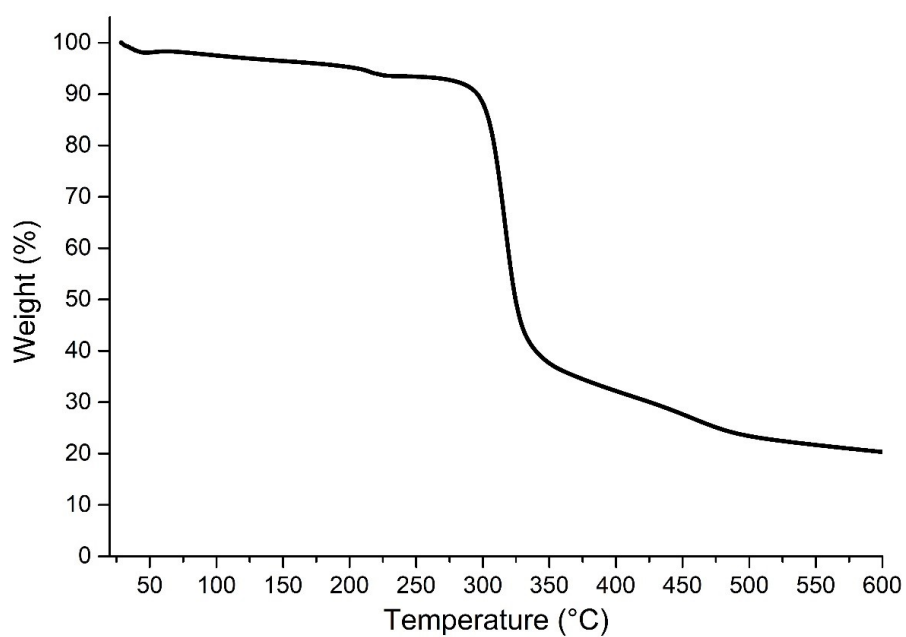

**Figure S1** Thermogram of **PC1a**.

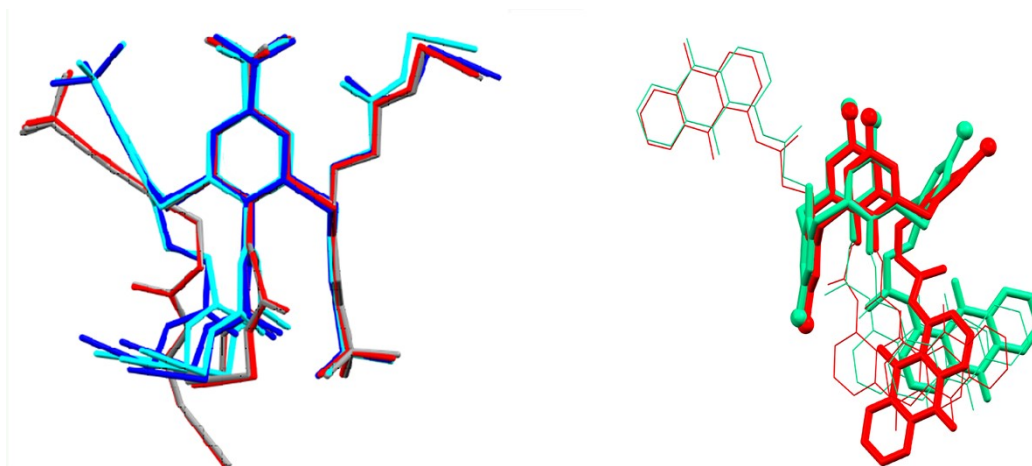

**Figure S2** On the left: overlay of calixarene molecules (**PC1a** – red, **PC1b** – grey, **PC1c** – blue, **PC1d** – cyan), indicating the differences in dihedral angles between the plane passing through four S atoms and the phenyl rings, as well as in the orientation of the bulky anthraquinone substituents. Hydrogen atoms and disorder have been omitted, and the anthraquinone moiety has been simplified, for clarity. On the right: overlay of **PC1a** with **PC1c**, indicating more clearly the changes in the molecular structures of the host molecules.

**Table S4** Intramolecular interactions present in **PC1c** and **PC1d**.

| D-H...A        | PC1c    |          |             | D-H...A        | PC1d    |          |             |
|----------------|---------|----------|-------------|----------------|---------|----------|-------------|
|                | H-A (Å) | D-A (Å)  | D-H...A (°) |                | H-A (Å) | D-A (Å)  | D-H...A (°) |
| N1-H1...O3     | 1.85    | 2.58(1)  | 139         | N1-H1...O3     | 1.95    | 2.652(4) | 136         |
| N2-H2...O7     | 1.97    | 2.63(1)  | 130         | N2-H2...O7     | 1.89    | 2.608(4) | 138         |
| N3-H3...O11    | 2.06    | 2.73(1)  | 133         | N3-H3...O11    | 1.92    | 2.639(4) | 138         |
| N4-H4...O15    | 1.95    | 2.64(1)  | 133         | N4-H4...O15    | 1.96    | 2.650(4) | 135         |
| C14-H14...O2   | 2.25    | 2.89(1)  | 124         | C14-H14...O2   | 2.13    | 2.784(4) | 125         |
| C92-H92...O14  | 2.15    | 2.77(1)  | 122         | C92-H92...O14  | 2.22    | 2.847(4) | 123         |
| C40-H40...O6   | 2.25    | 2.84(1)  | 119         | C66-H66...O10  | 2.19    | 2.827(4) | 124         |
| C66-H66...O10  | 2.31    | 2.98(1)  | 128         | C62-H62...O6   | 2.83    | 3.529(4) | 131         |
| C11-H11B...O13 | 2.18    | 3.13(1)  | 161         | C11-H11B...O13 | 2.23    | 3.186(4) | 163         |
| C11-H11A...O5  | 2.32    | 3.17(1)  | 143         | C11-H11A...O5  | 2.41    | 3.170(4) | 133         |
| C53-H53C...O2  | 2.4     | 3.29(1)  | 150         | C53-H53A...O6  | 2.52    | 3.234(4) | 129         |
| C81-H81C...O10 | 2.41    | 3.30(1)  | 149         | C36-H36...O10  | 2.44    | 3.208(5) | 138         |
| C11-H11B...S4  | 2.71    | 3.367(8) | 124         | C11-H11B...S4  | 2.75    | 3.384(4) | 123         |
| C63-H63A...S3  | 2.97    | 3.485(9) | 113         | C63-H63A...S3  | 2.91    | 3.463(3) | 116         |
| C55-H55A...O2  | 2.76    | 3.54(1)  | 136         | C40-H40...O6   | 2.26    | 2.876(4) | 122         |
| C55-H55A...O14 | 2.85    | 3.55(1)  | 129         | C54-H54A...O2  | 2.38    | 3.221(4) | 143         |
| C53-H53A...O6  | 2.91    | 3.56(1)  | 125         | C53-H53A...O2  | 2.74    | 3.478(5) | 132         |
| C29-H29C...O10 | 2.86    | 3.59(1)  | 132         | C37-H37A...S1  | 2.81    | 3.398(4) | 119         |
| C62-H62...O6   | 2.85    | 3.71(1)  | 150         | C40-H40...O6   | 2.26    | 2.876(4) | 122         |
| C79-H79A...O10 | 2.95    | 3.74(1)  | 138         | C79-H79C...O10 | 2.85    | 3.439(7) | 119         |
| C84-H84...O10  | 3.15    | 3.79(1)  | 126         | C89-H89A...S3  | 2.79    | 3.375(3) | 118         |

**Table S5** Intermolecular interactions present in **PC1c** and **PC1d**.

| D-H...A      | PC1c    |          |             | D-H...A                   | PC1d    |          |             |
|--------------|---------|----------|-------------|---------------------------|---------|----------|-------------|
|              | H-A (Å) | D-A (Å)  | D-H...A (°) |                           | H-A (Å) | D-A (Å)  | D-H...A (°) |
| C3-H3B...O12 | 2.48    | 3.412(9) | 158         | C42-H42...O8 <sup>i</sup> | 2.65    | 3.163(4) | 115         |

|                              |      |          |     |                                |      |           |     |
|------------------------------|------|----------|-----|--------------------------------|------|-----------|-----|
| C54-H54A...O14 <sup>i</sup>  | 2.57 | 3.48(1)  | 154 | C94-H94...O16 <sup>ii</sup>    | 2.73 | 3.199(5)  | 111 |
| C15-H15...O8 <sup>ii</sup>   | 2.63 | 3.49(1)  | 151 | C68-H68...O4 <sup>iii</sup>    | 2.6  | 3.280(4)  | 129 |
| C75-H75...O10 <sup>iii</sup> | 2.96 | 3.50(1)  | 118 | C51-H51...O3 <sup>iv</sup>     | 2.77 | 3.351(6)  | 120 |
| C80-H80A...O16 <sup>iv</sup> | 2.58 | 3.51(1)  | 159 | C89-H89B...O11 <sup>v</sup>    | 2.73 | 3.356(4)  | 122 |
| C55-H55C...O14 <sup>i</sup>  | 2.6  | 3.52(1)  | 156 | C50-H50B...Cg1 <sup>iv</sup>   | 2.53 | 3.3548(1) | 145 |
| C29-H29A...O6 <sup>v</sup>   | 2.62 | 3.54(1)  | 158 | C16-H16...O12                  | 2.62 | 3.384(4)  | 137 |
| C89-H89B...O15 <sup>iv</sup> | 2.61 | 3.57(1)  | 164 | C28-H28A...O6 <sup>vi</sup>    | 2.6  | 3.405(6)  | 140 |
| C77-H77...O16 <sup>i</sup>   | 2.93 | 3.63(1)  | 131 | C41-H41...O12                  | 2.78 | 3.465(4)  | 130 |
| C103-H103...O4 <sup>vi</sup> | 2.89 | 3.70(1)  | 145 | C1-H1B...O12                   | 2.82 | 3.668(4)  | 145 |
| C79-H79C...O16 <sup>iv</sup> | 2.96 | 3.81(1)  | 145 | C24-H24...S1 <sup>iv</sup>     | 2.98 | 3.734(4)  | 138 |
| C24-H24...O16 <sup>vi</sup>  | 2.95 | 3.82(1)  | 154 | C79-H79B...O14 <sup>v</sup>    | 2.87 | 3.802(7)  | 159 |
| C27-H27C...S1 <sup>vii</sup> | 2.94 | 3.87(1)  | 160 | C37-H37B...S2 <sup>vi</sup>    | 2.99 | 3.828(3)  | 142 |
| C37-H37B...S2 <sup>v</sup>   | 2.94 | 3.915(9) | 168 | C80-H80B...O14                 | 3.00 | 3.866(6)  | 148 |
|                              |      |          |     | C89-H89A...S3 <sup>v</sup>     | 2.96 | 3.918(4)  | 163 |
|                              |      |          |     | C125-H125...O4                 | 2.56 | 3.18(2)   | 123 |
|                              |      |          |     | C111-H111...O11 <sup>vii</sup> | 2.67 | 3.266(6)  | 122 |
|                              |      |          |     | C63-H63B...Cg2                 | 2.66 | 3.4274(1) | 135 |
|                              |      |          |     | C110-H110...O7 <sup>vi</sup>   | 2.74 | 3.461(6)  | 133 |
|                              |      |          |     | C107-H107...Cg3                | 2.94 | 3.4650(1) | 118 |
|                              |      |          |     | C114-H114...O4 <sup>iii</sup>  | 2.67 | 3.54(1)   | 152 |
|                              |      |          |     | C80-H80...Cg4                  | 2.94 | 3.9131(1) | 171 |

Cg is the centroid of the aromatic ring: Cg1 (C5-C10) C48, Cg2 (C106-C111), Cg3 (C57-C62), Cg4 (C113-C118); symmetry codes: **(PC1c)** (i) 1-x,1-y,-z, (ii) 1-x,1-y,-1-z, (iii) 1-x,-y,1-z, (iv) -x,1-y,-z, (v) 1-x,-y,-z, (vi) -x,1-y,-1-z, (vii) -x,-y,-z; **(PC1d)** (i) -x,1-y,-z, (ii) -x,-y,-z, (iii) -1+x,y,-1+z, (iv) 1-x,1-y,-z, (v) 1-x,-y,1-z, (vi) 1-x,1-y,1-z, (vii) 1+x,y,1+z.

**Table S6** Selected  $\pi \cdots \pi$  interactions present in **PC1c** and **PC1d**.

| <b>PC1c</b>               |                    | <b>PC1d</b>               |                    |
|---------------------------|--------------------|---------------------------|--------------------|
| <b>Cg...Cg</b>            | <b>Cg...Cg (Å)</b> | <b>Cg...Cg</b>            | <b>Cg...Cg (Å)</b> |
| Cg6...Cg12 <sup>i</sup>   | 3.4916(4)          | Cg8...Cg11 <sup>i</sup>   | 3.4727(1)          |
| Cg2...Cg15                | 3.4942(4)          | Cg4...Cg7                 | 3.5398(1)          |
| Cg2...Cg7                 | 3.5244(4)          | Cg3...Cg6                 | 3.5640(1)          |
| Cg3...Cg16                | 3.5515(4)          | Cg12...Cg15 <sup>ii</sup> | 3.5892(1)          |
| Cg11...Cg11 <sup>ii</sup> | 3.6390(4)          | Cg7...Cg10 <sup>i</sup>   | 3.6160(1)          |
| Cg12...Cg10 <sup>ii</sup> | 3.6411(4)          | Cg2...Cg15                | 3.6519(1)          |
| Cg2...Cg6                 | 3.6427(4)          | Cg11...Cg14 <sup>ii</sup> | 3.6644(1)          |
| Cg7...Cg11 <sup>i</sup>   | 3.6482(4)          |                           |                    |
| Cg10...Cg11 <sup>ii</sup> | 3.6664(4)          |                           |                    |
| Cg7...Cg3                 | 3.6915(4)          |                           |                    |

Cg is the centroid of the aromatic ring: **(PC1c)** Cg2 (C13-C18), Cg3 (C17-C22), Cg6 (C39-C44), Cg7 (C43-C48), Cg10 (C65-C70), Cg11 (C69-C74), Cg12 (C72-C78), Cg15 (C95-C100), Cg16 (C98-C101); **(PC1d)** Cg2 (C13-C18), Cg3 (C17-C22), Cg4 (C20-C26), Cg6 (C39-C44), Cg7 (C43-C48), Cg8 (C46-C52), Cg10 (C65-C70), Cg11 (C69-C74), Cg12 (C72-C78), Cg14 (C91-C96), Cg15 (C95-C100); symmetry codes: **(PC1c)** (i) x,y,1+z, (ii) 1-x,2-y,-1-z; **(PC1d)** (i) 1-x,1-y,1-z, (ii) 1-x,-y,1-z.

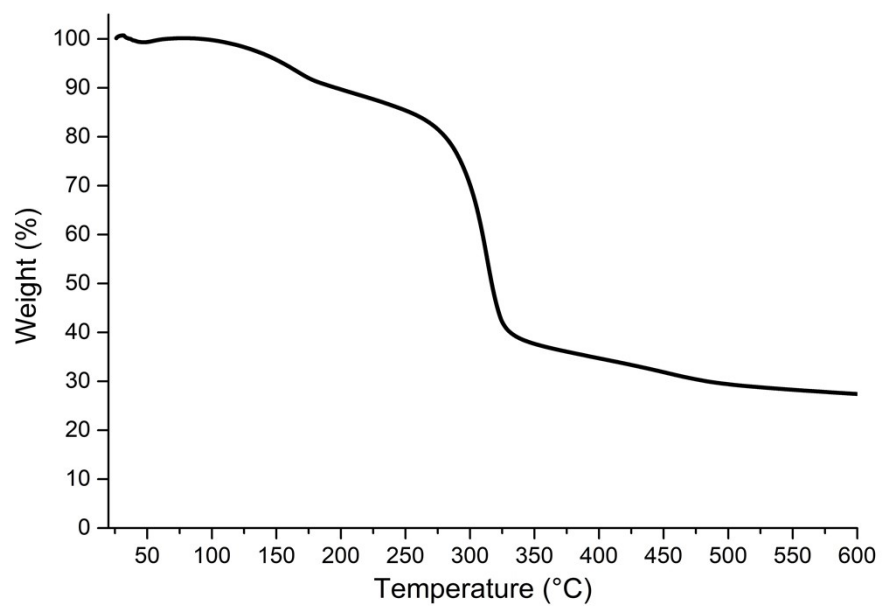

**Figure S3** Thermogram of **PC1d**.
